# Supplementary material
Source: publisher site journal article supplement (https://www.dovepress.com/article/272616)
Supplement: Supplementary file 1 [file get_supplementary_file.php]

Table S1: Predicted target genes of miR-34a-5p

| Starbase  | mirDIP  | Targetscan     | miRDB    |
|-----------|---------|----------------|----------|
| C11orf30  | SYT1    | VAMP2          | MDM4     |
| RBM16     | NAV3    | SLC23A3        | DLL1     |
| SUPT16H   | FAM76A  | PVRL1          | RAP1GDS1 |
| RNF41     | NOTCH1  | KCNK3          | FAM167A  |
| BRPF3     | DLL1    | TMED8          | HCN3     |
| PRKRIR    | PDGFRA  | LRRC55         | SDK2     |
| GTF3C4    | LGR4    | GABRA3         | FAM76A   |
| EPC2      | SATB2   | DPYSL4         | E2F5     |
| ZRANB1    | RALGPS2 | MET            | FKBP1B   |
| SIRT1     | ZDHHC17 | MPP2           | PPP1R11  |
| FBXO30    | E2F5    | EVI5L          | SCN2B    |
| FAM73A    | STRN3   | TMEM246        | MGAT4A   |
| ERC1      | FUT8    | ORAI3          | NAV3     |
| SCML2     | LEF1    | RAB43          | SYT1     |
| LBR       | TPD52   | DNAH10OS       | SATB2    |
| ARMC1     | FOXP1   | TMEM184B       | CELF3    |
| ZNF551    | PKP4    | TSPAN18        | XYLT1    |
| BAT2L1    | ARID4B  | VPS37B         | FLOT2    |
| LDOC1L    | ZNF281  | LZTS3          | MET      |
| CRK       | PKIA    | TUSC5          | MYCN     |
| TBP       | ANK3    | ZNF282         | PACS1    |
| DHX33     | ACBD3   | RSPO4          | NAV1     |
| FOXN3     | TMEM55A | ZCCHC17        | CACNA1E  |
| CTCF      | UBP1    | FOXJ2          | LGR4     |
| ZMYND11   | E2F3    | ISY1-<br>RAB43 | NECTIN1  |
| RAB11FIP2 | JAG1    | SHISA7         | TGIF2    |

---

|          |         |            |          |
|----------|---------|------------|----------|
| PTPN4    | WASF1   | LPAR2      | VAMP2    |
| VCL      | POGZ    | NOS1AP     | FUT9     |
| MEX3C    | MLLT3   | FOXP1      | PKP4     |
| POLR3F   | PPP1R11 | SEPT3      | RRAS     |
| C5orf41  | DDX17   | WASF1      | SHANK3   |
| ZNF134   | CTNND2  | RIC8B      | ABR      |
| STK38L   | MET     | CTNND2     | AHCYL2   |
| DNAJB6   | MYRIP   | RRAGC      | MPP2     |
| TGFBR2   | JAKMIP1 | AL117190.3 | CUEDC1   |
| DCTN5    | GALNT7  | ATMIN      | SLC25A27 |
| PTPRG    | FOXN3   | RPS6KA4    | MLLT3    |
| SMAD4    | SOX4    | LMAN2L     | PITPNC1  |
| MLL      | UHRF2   | MYRIP      | CAMTA1   |
| PKIA     | BRINP1  | RAE1       | NPNT     |
| DDX18    | ZNF644  | MTMR9      | MEX3C    |
| C14orf43 | ZFHX4   | B3GAT1     | FOXP1    |
| SPEN     | ACSL1   | ADK        | TBL1XR1  |
| EIF2C2   | FOXN2   | ELL2       | CYREN    |
| TMEM185B | COL12A1 | C8orf37    | TOB2     |
| PFKM     | BCL2    | METAP1     | SRPRA    |
| WAC      | MPP2    | APH1A      | FUT8     |
| AKT3     | NR4A2   | ATXN7L3B   | TMEM255A |
| SNX12    | FNDC3B  | PKIA       | PPARGC1B |
| WDR82    | FLOT2   | UHRF2      | TNRC18   |
| EXT2     | AGO4    | THSD4      | JAKMIP1  |
| DLX2     | TGIF2   | USF1       | SNAI1    |
| UBR5     | HCN3    | SIDT2      | NUMBL    |
| PCYOX1   | NUMBL   | CELF3      | FGD6     |
| PREPL    | CBFA2T3 | POMGNT1    | ELMOD1   |

---

---

|           |          |         |          |
|-----------|----------|---------|----------|
| FOXP2     | BNC2     | FBXO10  | FOXN2    |
| ZNF281    | SATB1    | IKZF1   | KIAA1217 |
| GAS1      | TAF5     | GPR12   | TPPP     |
| TNRC18    | AKAP6    | TMEM109 | LEF1     |
| MTMR9     | PTPRM    | ZC3H12B | UBP1     |
| ARPP19    | VAMP2    | DAAM1   | GABRA3   |
| ASB1      | NRIP3    | CES4A   | OLIG3    |
| ADAMTS1   | EML5     | CRTC1   | HNF4A    |
| LSM14A    | TCF12    | AGTRAP  | FOXJ2    |
| EIF4G2    | ACSL4    | HDAC1   | ASIC2    |
| DAAM1     | FOXG1    | RASGRP4 | EML5     |
| DLL1      | KIAA1217 | SLC44A2 | BMP3     |
| E2F5      | JMJD1C   | SVOP    | DAAM1    |
| ZNF417    | PRKD1    | B4GALT2 | DNM1L    |
| ZNF644    | ZMYM4    | TMEM164 | GALNT7   |
| HNRNPR    | SGPP1    | TOB2    | TASOR    |
| FAM160B1  | SVOP     | LRRC7   | PPFIA1   |
| SLC39A10  | MYCN     | RALY    | ZMYM4    |
| C14orf135 | PACS1    | CHD1    | CERS6    |
| TGIF2     | RGS17    | ARSJ    | RPS6KL1  |
| SNAPC5    | PNOC     | NAA50   | GPR22    |
| LCORL     | RRAS     | CTDSP2  | TAF4B    |
| ZNF800    | PEA15    | SIPA1   | SERPINF2 |
| TMEM48    | KLF4     | TMOD2   | LMAN1    |
| MOBKL3    | MEX3C    | CNTNAP1 | ARID4B   |
| TAOK1     | CCNE2    | VWA5B2  | FAM117B  |
| CDK6      | RAB21    | JHDM1D  | CACNB3   |
| C6orf120  | ALDOA    | PTPRM   | UNC13C   |
| ATMIN     | VAT1     | ELMSAN1 | CDK6     |

---

---

|          |          |         |          |
|----------|----------|---------|----------|
| PAFAH1B2 | MAP2K1   | SIX3    | ADO      |
| MCFD2    | SCN2B    | FRMD4A  | CREB3L2  |
| PPIL1    | DCX      | FNDC8   | TMEM184B |
| MKRN2    | ATP5S    | DAGLA   | GOLPH3L  |
| ATXN7L3B | LIMD2    | JAG1    | ATMIN    |
| IREB2    | AXL      | SUPT6H  | AKIP1    |
| STC2     | CNOT6    | CDKN1C  | NRN1     |
| ROCK1    | NAV1     | SYT9    | SLC4A7   |
| ANKS1A   | BCL11B   | INPP5K  | IL6R     |
| ARID1A   | SLC2A13  | STAC2   | STRN3    |
| SOCS4    | EVI5L    | PTPN4   | UCN2     |
| ZFHX4    | CAPN6    | WSCD2   | KDM5D    |
| TM9SF2   | SAR1A    | GHDC    | ZDHHC17  |
| YIPF6    | PPFIA1   | ACSL1   | TPCN2    |
| SYNJ2    | CORO1C   | ESRRA   | HSPA1B   |
| RNF38    | MSL2     | PDE4B   | RPGRIP1L |
| RNF138   | CAMTA1   | ST8SIA3 | PDE7B    |
| C12orf29 | LGI1     | MYH9    | SMIM15   |
| CBX1     | RTF1     | ZIC5    | CTNND2   |
| FOXN2    | TMEM255A | AGAP2   | PURB     |
| PPP2R5C  | GLCE     | HK1     | TSN      |
| PJA2     | MGAT4A   | FOXG1   | FGF23    |
| G3BP2    | RALGDS   | MLLT1   | ANK3     |
| GMFB     | NETO1    | CNOT6L  | AMER1    |
| CUX1     | ASIC2    | TBC1D13 | PPP2R3A  |
| PAPOLA   | ELMOD1   | GORASP2 | SFT2D1   |
| GSPT2    | HTR2C    | RAP1GAP | CLOCK    |
| PLCG1    | TMEM246  | TANGO2  | CPLX2    |
| ZFP91    | YY1      | SP2     | GPR158   |

---



---

|          |         |          |         |
|----------|---------|----------|---------|
| RORA     | BTBD11  | KCNQ3    | RFX3    |
| CRKL     | BRPF3   | COPS7B   | SHOC2   |
| MCM3APAS | DAAM1   | CDC37    | PDXK    |
| MYC      | NRN1    | C22orf23 | DGKZ    |
| KIAA0196 | OSGIN2  | NAPEPLD  | PTGIS   |
| RDH11    | XYLT1   | ZNF207   | MTMR10  |
| PPAP2B   | ARID4A  | GPC6     | MBLAC1  |
| MOAP1    | FOXJ2   | MRAS     | SAR1A   |
| BNC2     | FBXO30  | RORA     | BCL2L13 |
| PHF6     | PPP2R3A | PGAP2    | ANKRD52 |
| STRAP    | AFF4    | KLC2     | ADIPOR2 |
| DDX6     | DIXDC1  | FAM126B  | KITLG   |
| HECTD2   | SIRT1   | ARID4B   | TMEM164 |
| SLC25A32 | SEMA4C  | DCAF7    | GMNC    |
| RAB3GAP1 | TTC19   | CACNA2D1 | BRINP1  |
| LGR4     | ASB1    | PSD3     | CBX3    |
| STRN3    | LDHA    | TGFBRAP1 | ANKS1A  |
| ZFAND1   | CALCR   | PCDH1    | MYT1    |
| NSD1     | RELN    | ACTR1A   | DPYSL4  |
| SEC24B   | FGD6    | INO80    | ZNF644  |
| ZNF507   | ATMIN   | SYVN1    | NRIP3   |
| KIAA1462 | EPHA4   | SBK1     | ZYG11B  |
| PURA     | DGKZ    | POFUT1   | BRPF3   |
| BAZ2A    | CASP2   | TBC1D25  | TPD52   |
| TMEM20   | DPYSL4  | TFDP2    | ABCD1   |
| FAM122A  | TBL1XR1 | GATAD2B  | SHKBP1  |
| ZHX2     | NECTIN1 | TNPO3    | JADE2   |
| TRAPPC6B | PAN3    | FAT2     | SGPP1   |
| CALU     | ACTR1A  | VCL      | ZNF281  |

---

---

|          |          |          |          |
|----------|----------|----------|----------|
| MYCL1    | ARHGAP26 | ADAM11   | CCNE2    |
| ZBTB9    | SYNJ1    | KREMEN1  | ASB4     |
| MOBKL1B  | AHCYL2   | RNF152   | ZNF304   |
| HNRNPA1  | TMEM109  | ZER1     | ARHGAP26 |
| PPP3R1   | OXSRI    | JPH3     | ZFHX4    |
| TOPORS   | CPEB2    | GIGYF1   | BNC2     |
| KIAA1704 | SLC4A7   | ATXN7L3  | POGZ     |
| EPS15    | SLCO3A1  | HCFC2    | C14orf28 |
| ADIPOR2  | KITLG    | GLCE     | ZBTB9    |
| HACE1    | ZCCHC17  | SEC16A   | PNOC     |
| AMD1     | BAZ2A    | MAZ      | TENT5A   |
| CORO1C   | MTA2     | RNF213   | RRAGC    |
| PPP1CC   | AMER1    | GATS     | FAM83A   |
| BAMBI    | FAM167A  | KIAA1024 | GLCE     |
| BRD2     | JADE2    | EHD4     | WASF1    |
| CHTF8    | MPPED2   | CYB561D1 | DIXDC1   |
| ZBTB4    | CAMSAP1  | ACOT11   | SEMA4B   |
| USP33    | LHX2     | KIAA0753 | PPP1R16B |
| PSME3    | CSF1R    | LPHN1    | PLAG1    |
| CNTNAP1  | CACNB3   | MAP4K4   | STK38L   |
| RTN4     | SNX15    | DOCK3    | ADAM22   |
| DCAF7    | FOSL1    | CACNA2D2 | ZNF551   |
| CTNND1   | RIC8B    | AHCYL2   | CDH13    |
| LYPLA1   | SERPINF2 | FBXO41   | SNTB2    |
| MBNL1    | CELF3    | BCL9L    | GP5      |
| SRPK1    | ARHGAP1  | GDAP1L1  | ADD2     |
| ACSL4    | C3orf58  | GRID1    | HTR2C    |
| CNNM2    | GMFB     | MRPL3    | CLCN3    |
| ADAM10   | FKBP1B   | G6PC3    | TRIM67   |

---

---

|          |          |         |          |
|----------|----------|---------|----------|
| CNOT4    | MAP1A    | MRPL52  | FRA10AC1 |
| BCL2     | SCML2    | TMEM134 | RCAN1    |
| SSR1     | CACNA1E  | GABRB1  | LYST     |
| SHOC2    | BMP3     | ZBTB20  | MAP7D3   |
| SLC20A2  | INHBB    | TMEM97  | XPO5     |
| GOLT1B   | SGSM2    | GATSL2  | MGAT5B   |
| PKP4     | TMCC3    | CACNG2  | FBXO30   |
| SNX9     | YTHDC1   | WNT1    | ACSL4    |
| LSM11    | CCND1    | RBCK1   | RELN     |
| MARCKS   | CNTNAP2  | NEUROD2 | DNAJC16  |
| PEG10    | RARB     | CNTD1   | LILRA1   |
| FIGN     | ZDHHC23  | KLHDC8A | DCAF7    |
| ULK1     | GPR85    | TRIM44  | RAB21    |
| PHF8     | LOXL3    |         | SLC44A2  |
| ERLIN1   | CERS6    |         | OSGIN2   |
| SV2A     | TOPORS   |         | AGO4     |
| DEGS1    | NCEH1    |         | JAG1     |
| YY1      | GREM2    |         | SOGA1    |
| TFAP2A   | MTMR9    |         | TANC2    |
| AASDHPPT | RPS6KA4  |         | TMEM200B |
| KANK1    | LZTS3    |         | PDGFRA   |
| PPP6C    | NOTCH2   |         | AXL      |
| GINS3    | TMEFF1   |         | SLC27A4  |
| ANKRD52  | CNTN2    |         | CDC25A   |
| UBE2D3   | PURB     |         | ZBTB20   |
| C1orf9   | SLC2A4RG |         | CBFA2T3  |
| NF1      | GAS1     |         | INA      |
| EEA1     | LMBR1L   |         | KLF4     |
| TJAP1    | MARCKSL1 |         | RTN4RL1  |

---

---

|         |          |         |
|---------|----------|---------|
| MGAT4A  | PIP5K1A  | EPHA4   |
| UBE2G1  | GPR158   | LMAN2L  |
| RAPGEF2 | ZNF207   | CACNA1C |
| SBDS    | NDST1    | SHISA7  |
| RNF44   | ALCAM    | LDHA    |
| PTCD3   | PGRMC2   | NOS1AP  |
| UBE3C   | ANK2     | OAZ2    |
| NOTCH2  | STX17    | PLOD1   |
| ANP32A  | PODXL    | STX17   |
| SSFA2   | PPP1CC   | SLC37A3 |
| TSN     | INA      | CA7     |
| DOCK4   | SNTB2    | ZDHHC16 |
| PHF19   | PLAG1    | FRMD5   |
| RAB10   | ELL2     | STAB2   |
| GLCE    | IGSF1    | MAP2K1  |
| UBP1    | CD47     | NCEH1   |
| GMNN    | VPS37B   | RALGPS1 |
| CHD9    | SEMA4F   | USP31   |
| ZNF100  | PID1     | DPP3    |
| BCL11A  | MDM4     | SNX15   |
| CDC23   | ZDHHC16  | ANK2    |
| SYNJ1   | LMAN2L   | ACBD3   |
| STARD7  | PGM1     | RTL6    |
| MLL2    | COPS7B   | RGS17   |
| HMMR    | ELMSAN1  | CNOT6   |
| BAT2L2  | CPLX2    | PLEKHH2 |
| SAR1A   | PPP1R16B | ERGIC1  |
| DNM1L   | SLC30A3  | TRANK1  |
| TUBB    | SLC25A27 | PRKD1   |

---

---

|           |          |         |
|-----------|----------|---------|
| TMEM109   | ORMDL3   | TAF5    |
| ITPR1     | FNDC8    | RAD9B   |
| PDE4B     | LYST     | IGF2BP3 |
| XPO7      | RIMS3    | PGM1    |
| RAPGEF1   | XPO5     | ESYT3   |
| PTGES3    | NFE2L1   | EPN2    |
| NAA50     | GRM7     | ARHGAP1 |
| C14orf129 | MTUS1    | TMEM109 |
| TMTC3     | CPEB3    | ASB1    |
| CDADC1    | RAP1GDS1 | MMAB    |
| OXR1      | GABRA3   | DAGLA   |
| CSNK1G1   | ITSN1    | PEA15   |
| PRC1      | CA7      | SIDT2   |
| SGPP1     | STK38L   | MCIDAS  |
| TSPAN12   | CHD1     | KCNK3   |
| TOPBP1    | C6orf120 | EPS15L1 |
| ANP32B    | PLCB1    | SNX9    |
| NOP56     | APH1A    | NCDN    |
| MAP2K1    | ABR      | GMFB    |
| PURB      | DCP1A    | RPS6KA4 |
| YPEL5     | GOLPH3L  | LHX2    |
| TOP2A     | CDK6     | E2F3    |
| TBL1XR1   | PPM1A    | RDH11   |
| GTPBP4    | RTN4RL1  | NOTCH2  |
| REPS1     | FAM126B  | ZCCHC17 |
| BNIP2     | PTPRD    | GREM2   |
| ZDHHC17   | CR2      | ERC1    |
| EDARADD   | TOB2     | SYNJ1   |
| PAG1      | XBP1     | RTL8A   |

---

---

|          |          |          |
|----------|----------|----------|
| CD59     | STC1     | CDH9     |
| SPRYD3   | IL6R     | MYH9     |
| CPSF6    | FUT9     | TMEM74   |
| ATG2A    | SERPINE1 | SGTA     |
| MAZ      | ANP32A   | ZMYND11  |
| TMBIM6   | SGTA     | CA10     |
| FKBP1A   | DMWD     | PPM1A    |
| KDM6B    | DNAJC16  | VCL      |
| CPEB3    | NCOA1    | SSX5     |
| RTF1     | HSPA1B   | PAX5     |
| UBN2     | ARHGAP36 | TMEM79   |
| EFNB2    | SMIM15   | C9orf47  |
| TNRC6B   | NAA50    | XBP1     |
| PAIP2    | DYNC1LI1 | CHM      |
| POGZ     | MYH9     | THSD4    |
| SERPINB9 | DOCK9    | CAMK4    |
| C2orf42  | STAC2    | SNX12    |
| LYAR     | PALLD    | NSD1     |
| PRKAR1A  | C14orf28 | LIN28B   |
| MTMR4    | CNTNAP1  | ZNF16    |
| HOXA13   | TSN      | ATG5     |
| BLZF1    | PPP2R5A  | ARHGEF33 |
| ACVR1    | TBCK     | UHRF2    |
| TMEM22   | ATG9A    | GINS3    |
| GIGYF1   | USP31    | FAM107A  |
| SPTBN2   | CNOT6L   | NOTCH1   |
| C6orf106 | RALGPS1  | CDH4     |
| NACC2    | RECK     | ALDOA    |
| TSPAN14  | CHMP7    | WIPI2    |

---

---

|         |          |         |
|---------|----------|---------|
| SYVN1   | RCAN1    | TBCK    |
| POFUT1  | ZNF282   | ACSL1   |
| ZNF189  | CREB5    | SURF4   |
| ORC6L   | RANBP10  | LIMD2   |
| RPS18   | PREB     | ELL2    |
| POU2F1  | CTNND1   | ISY1    |
| C1orf52 | SEH1L    | BTBD11  |
| CCT3    | CACNB1   | ATG4B   |
| POGK    | EI24     | PEG10   |
| MRPL30  | SURF4    | DMWD    |
| FOXP1   | MCFD2    | COL26A1 |
| ANKRD17 | ARSJ     | ANP32A  |
| CDKN1B  | TNRC6B   | MLLT1   |
| HECTD1  | ABRAXAS2 | UBL4A   |
| KLF10   | FBXO10   | YTHDC1  |
| METAP1  | TMUB2    | ALG13   |
| RAB21   | FAM46A   | GAS1    |
| DMTF1   | RAB43    | CNTN2   |
| LRRFIP1 | PDCD4    | JMJD1C  |
| FNDC3B  | TMEM200B | SIDT1   |
| ARL2    | NRXN2    | SLC6A17 |
| HSPA1A  | RDH11    | SUCO    |
| CCNA2   | LRRC40   | CAPN6   |
| PODXL   | DNAJC24  | DMAC2L  |
| LIN28B  | CNOT4    | METAP1  |
| FAM127B | VCL      | ZNF641  |
| EIF4A1  | CSNK1G3  | TNFSF14 |
| TM9SF3  | PPP1R10  | SGSM2   |
| ZFP36L1 | MAPT     | RIMS3   |

---

---

|          |         |          |
|----------|---------|----------|
| LONRF1   | METAP1  | PPP1R10  |
| ELL2     | ADK     | CORO1C   |
| DDX17    | PEG10   | MYRIP    |
| FANCI    | HOXA13  | ZHX2     |
| TDRD9    | TRIM67  | LELP1    |
| CEP55    | DCAF7   | DDX17    |
| SLC48A1  | PDE7B   | PRDM11   |
| MARCKSL1 | DNAJB1  | TM9SF3   |
| SPRY2    | SIDT1   | KMT5B    |
| PARD6B   | SDHC    | HK1      |
| ARHGAP1  | EFNB1   | BAZ2A    |
| CREG1    | IKZF1   | PLCB1    |
| FAM18B   | LRRC55  | AMER2    |
| C12orf73 | ZC3H12B | VWA5B2   |
| CDK5R1   | SRPRA   | H6PD     |
| ONECUT2  | FAM117B | ACE      |
| ARID4B   | ACVR2B  | TP53INP2 |
| EVI5L    | GATA3   | TPD52L3  |
| IBTK     | RNF44   | FAM219A  |
| ATXN7L3  | BCL6    | SDR9C7   |
| PNP      | ADGRG2  | CTDSP2   |
| ACTR1A   | ANP32B  | JCAD     |
| KIAA0802 | TEX264  | ASPHD2   |
| IMPA1    | SHKBP1  | MSTN     |
| SLC4A7   | FRMD4A  | ADAM10   |
| RHOB     | PLOD1   | SLC35G2  |
| LRP10    | F2RL2   | CD47     |
| C7orf49  | PRKACB  | PIP5K1A  |
| RFK      | PPP6C   | AKAP6    |

---



---

|          |         |          |
|----------|---------|----------|
| SRC      | POU6F1  | FAT4     |
| ATXN2L   | FRK     | TNRC6B   |
| AEBP2    | ZIC5    | SPICE1   |
| SLC25A13 | ZMYND11 | LRRC40   |
| CD47     | B4GALT2 | PROX1    |
| REEP5    | KLF12   | PLPP5    |
| GTF2F1   | HECW2   | UBN2     |
| MMD      | SLC12A2 | PTPN4    |
| E2F3     | WSCD2   | MED8     |
| SOX4     | STX1A   | PPP2R5A  |
| VAMP2    | MTMR4   | IRAK2    |
| PPP1R15B | CTDSPL  | NR4A2    |
| TBCA     | ESRRA   | ORAI3    |
| ITSN2    | RALY    | C16orf58 |
| NPTX1    | ADO     | ZNF282   |
| ATF3     | STRAP   | CDS2     |
| SLC2A1   | CLOCK   | NDST1    |
| LEF1     | SIDT2   | FOXN3    |
| ARSB     | ADIPOR2 | TUBGCP3  |
| PEA15    | COL4A4  | COL5A2   |
| MOCS2    | LMAN1   | TFCP2L1  |
| STX17    | LRRC7   | DCX      |
| GGPS1    | C7orf49 | SOCS7    |
| ANKFY1   | RET     | SIRT1    |
| FAM76A   | ANKS1A  | MRPL10   |
| CASK     | KDM7A   | CASP2    |
| PHF15    | SCN1A   | SVOP     |
| MSL2     | ADD2    | BCL11B   |
| ZC3H4    | ITGB8   | CCDC85A  |

---

---

|          |          |           |
|----------|----------|-----------|
| RRAGD    | SMAD4    | RALGPS2   |
| ADIPOR1  | ZNF304   | VPS37B    |
| C1orf144 | GRID1    | SEMA4F    |
| SLC25A44 | ZER1     | TMEM250   |
| NEDD8    | SP2      | MSL2      |
| ZFP36    | CSNK1G1  | CPEB3     |
| LNX2     | ERGIC1   | EME1      |
| DYNC1LI2 | SPEG     | KCNA2     |
| FAM49B   | SOCS4    | ARID4A    |
| PAM      | TMEM25   | VAT1      |
| GPBP1    | DPP3     | ADGRG2    |
| SLC2A3   | THSD4    | SMAD4     |
| ZFYVE21  | TBC1D25  | MCFD2     |
| LDHA     | AREG     | PPP1R14D  |
| CPEB2    | PPARGC1B | PEAK1     |
| CNN2     | SDK2     | SF3B3     |
| STK33    | MRPL52   | ZDHHC23   |
| OGT      | ZNF641   | SLC2A4RG  |
| LMAN2L   | ADGRL1   | IRGQ      |
| CYB5R3   | PDE4B    | DGKH      |
| TMED7-   |          |           |
| TICAM2   | SZRD1    | CXCL10    |
|          | SUCO     | C14orf132 |
|          | CRHR1    | PRKCB     |
|          | AP1B1    | AFF4      |
|          | PLCG1    | ALCAM     |
|          | HS2ST1   | PIP4P2    |
|          | SPCS2    | MPV17L2   |
|          | ATXN7    | SYNC      |

---

---

|          |          |
|----------|----------|
| CDKN1C   | RUFY2    |
| RARG     | NISCH    |
| TMEM184B | UCP3     |
| NOS1AP   | SNX17    |
| ANKRD52  | SLC25A35 |
| DOCK3    | PRKCQ    |
| PPP1R14D | RNF44    |
| LIMA1    | MYB      |
| MECP2    | ENAM     |
| SAMD12   | PPDPFL   |
| SLC27A4  | KIAA0825 |
| SEC61A1  | KY       |
| ATXN7L3  | USF1     |
| PER2     | AK4      |
| STK35    | FOSL1    |
| CREBRF   | OR2H1    |
| TRANK1   | OXSRI    |
| LRRTM2   | NAT8L    |
| SLC35G2  | EIF2S2   |
| OLFML1   | FUT11    |
| PHF24    | KCNH7    |
| DGKI     | ANHX     |
| PLEKHH2  | SAMD12   |
| CELF2    | SEMA4C   |
| IGFBP3   | ERLIN1   |
| ATG4B    | ADRA1D   |
| NCDN     | STX1A    |
| RNF213   | BCL6     |
| CUEDC1   | P2RY14   |

---

---

|         |          |
|---------|----------|
| CDIP1   | IQGAP3   |
| SYVN1   | C3orf70  |
| B3GAT3  | KALRN    |
| JAZF1   | CCN5     |
| NAPEPLD | MCTP1    |
| POU2F1  | ARHGDIB  |
| OGT     | PER2     |
| JPH1    | DUOXA1   |
| FOXP2   | NFE2L1   |
| GPR22   | TMCC3    |
| PHF19   | EDAR     |
| TM9SF3  | MOAP1    |
|         | SYT9     |
|         | CNTNAP2  |
|         | LRRC46   |
|         | CSF1R    |
|         | WSCD2    |
|         | SH3PXD2A |
|         | ROCK1    |
|         | C8orf37  |
|         | BTBD18   |
|         | RASL12   |
|         | OLFML1   |
|         | FAM131B  |
|         | TWIST2   |
|         | HS2ST1   |
|         | PXDC1    |
|         | KLRC4-   |
|         | KLRK1    |

---

---

KCNA6  
KLRK1  
USP54  
PPM1L  
PTPN2  
ILDR2  
AP4B1  
S1PR2  
RNASEL  
NOL10  
SPRED1  
RTN4  
GRM7  
RNF38  
CBFB  
ATG9A  
PRKAG1  
FAM120AOS  
POU3F3  
ACVR2B  
IGSF3  
FRK  
YY1  
SLCO2A1  
ATP6V0B  
TMEM72  
CHMP7  
TMEM59L  
AP1S2

---

---

LZTS3

LRRTM2

ULBP2

SLC6A1

ZNF844

TGFBRAP1

ISY1-RAB43

NAPEPLD

TMEM104

SCML2

RNF144B

CSRNP3

TTC19

RAB43

CR2

---

Figure S1

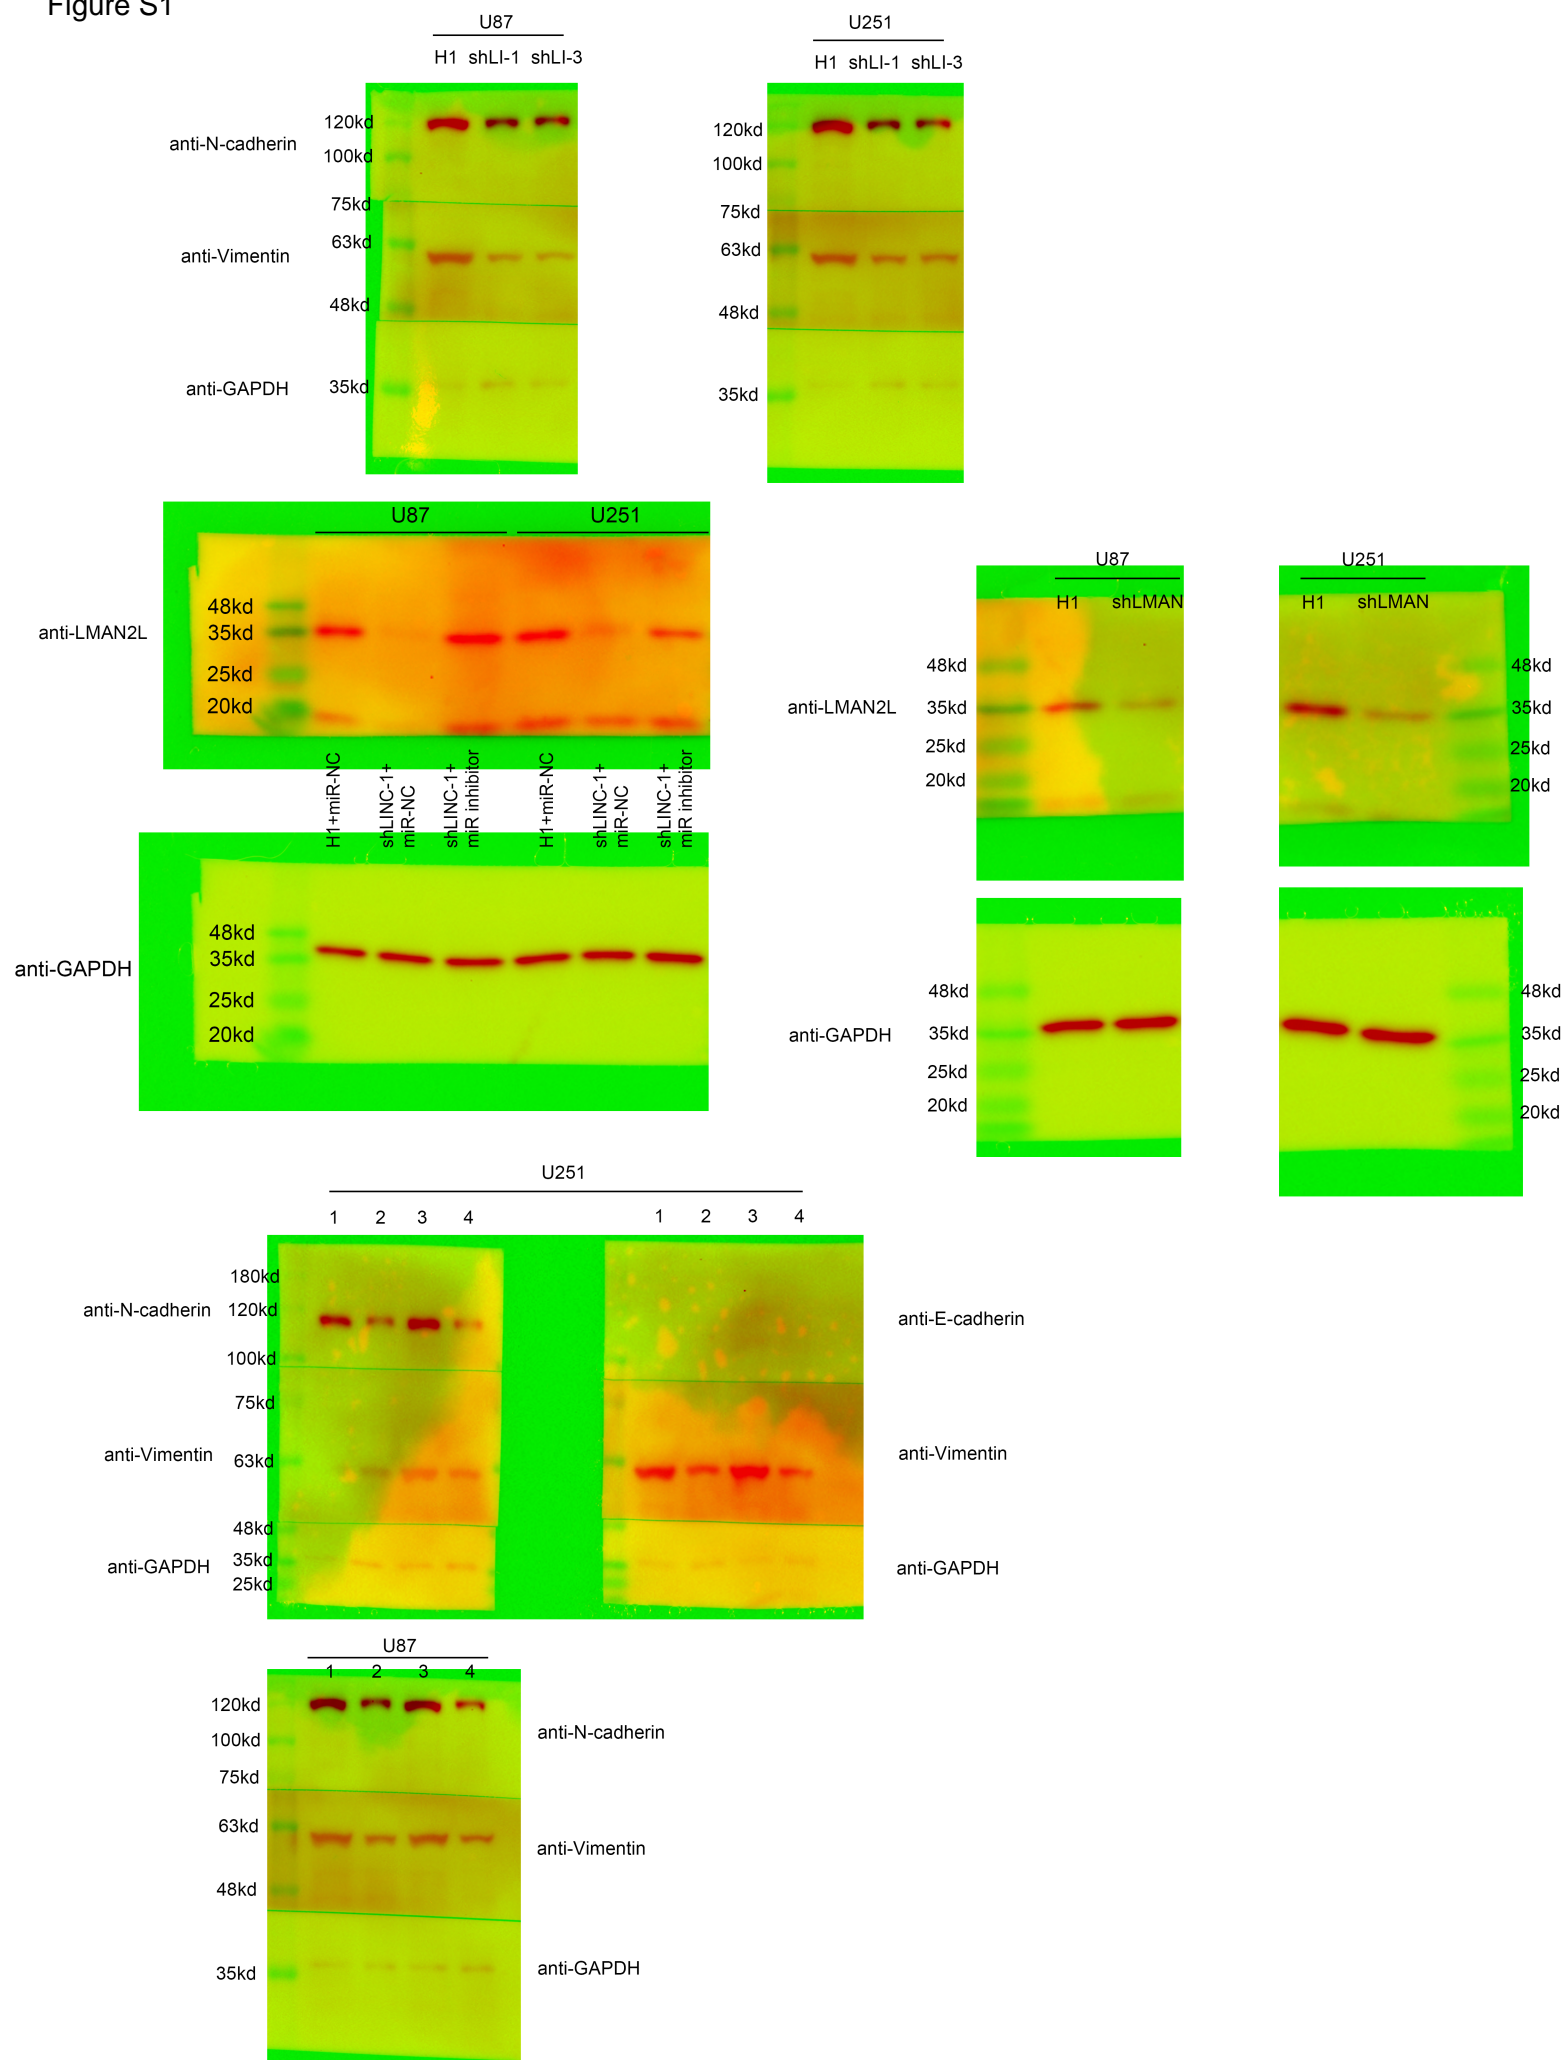

Figure S1. The uncropped and unedited versions of the Western blots (Figure 3C, 5H, 6B and 6E). The antibodies, lanes and molecular mass markers were labelled.

Figure S2

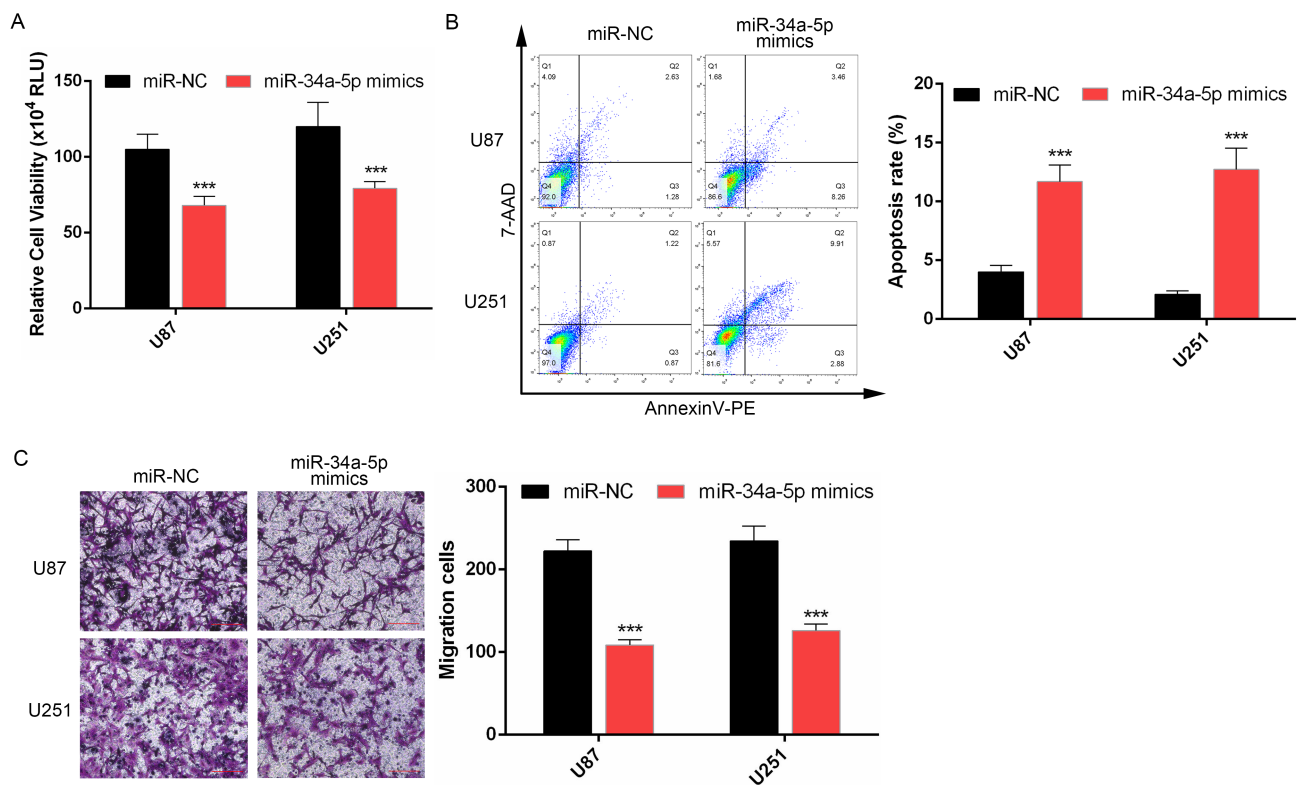

**Figure S2. miR-34a-5p overexpression suppressed cell growth, migration and induced apoptosis in glioma. (A)** Proliferation of miR-34a-5p-overexpressed U87 and U251 cells was quantitated by Celltiter-Glo assay. **(B)** Flow cytometry was utilized to measure the apoptotic rates of U87 and U251 cells following either miR-NC or miR-34a-5p mimics transfection. **(C)** Transwell assay was applied to evaluate the cell migration affected by miR-34a-5p overexpression. Scale bar = 500  $\mu$ m. Note: RLU, relative light unit; AAD, aminoactinomycin D; \*\*\* $P < 0.001$



Figure S3

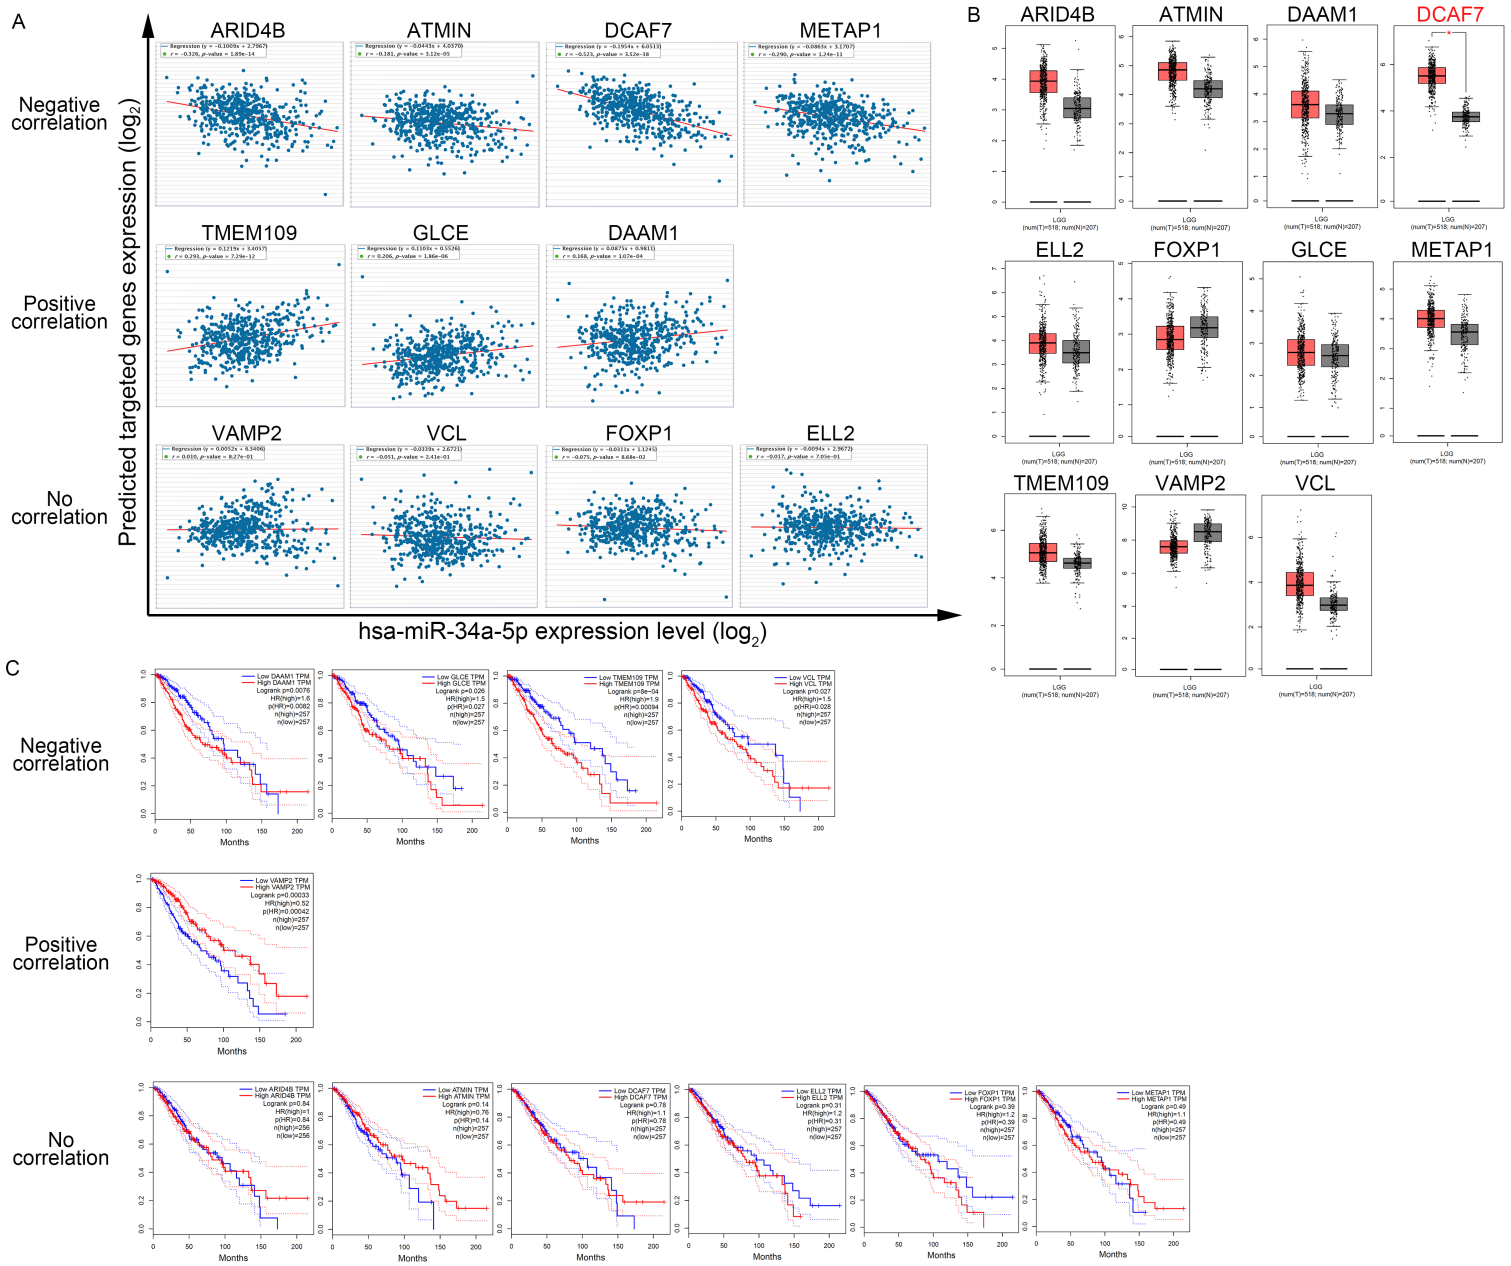

**Figure S3. Bioinformatic analysis of correlation, expression and survival risk of predicted miR-34a-5p target genes (ARID4B, ATMIN, DAAM1, DCAF7, ELL2, FOXP1, GLCE, METAP1, TMEM109, VAMP2, VCL) using GEPIA or TCGA database. (A)** Pearson's correlation between the expression of miR-34a-5p and predicted miR-34a-5p target genes in glioma tissues. **(B, C)** The expression level **(B, red color indicated significance)** and survival risk **(C)** of predicted miR-34a-5p target genes in glioma patients. Note: LGG, low-grade glioma; T, glioma tissue; N, normal tissue; ARID4B, AT-Rich interaction domain 4B; ATMIN, ATM interactor; DAAM1: dishevelled associated activator of morphogenesis 1; DCAF7: DDB1 and CUL4 associated factor 7; ELL2, elongation factor for RNA polymerase 2; FOXP1, forkhead box P1; GLCE, glucuronic acid epimerase; METAP1, methionyl aminopeptidase 1; TMEM109, transmembrane protein 109; VAMP2, vesicle-associated membrane protein 2; VCL, vinculin.
